# Supplementary material
Source: publisher site journal article supplement (https://www.dovepress.com/article/322391)
Supplement: Supplementary file 1 [file get_supplementary_file.php]

**Table S1. Pathogen distribution of specimens from different sources**

| Specimen source                | Pathogens identified                                                                                                                                                                                                                                                          |
|--------------------------------|-------------------------------------------------------------------------------------------------------------------------------------------------------------------------------------------------------------------------------------------------------------------------------|
| <b>Blood</b>                   | Escherichia coli, Klebsiella pneumoniae, Acinetobacter baumannii, Staphylococcus aureus, Enterobacter cloacae, Candida albicans, Epstein-barr virus, Cytomegalovirus, Hepatitis E virus, Adenovirus, Haemophilus influenzae                                                   |
| <b>Sputum</b>                  | Escherichia coli, Klebsiella pneumoniae, Acinetobacter baumannii, Staphylococcus aureus, Candida albicans, Pseudomonas aeruginosa, Streptococcus pneumoniae, Candida tropicalis, Candida glabrata, Chryseobacterium gleum, Enterococcus faecium, Stenotrophomonas maltophilia |
| <b>Hydrothorax and ascites</b> | Escherichia coli, Klebsiella pneumoniae, Acinetobacter baumannii, Staphylococcus aureus, Candida albicans, Pseudomonas aeruginosa, Streptococcus pneumoniae, Candida tropicalis, Candida glabrata, Chryseobacterium gleum, Enterococcus faecium, Stenotrophomonas maltophilia |
| <b>Pus</b>                     | Escherichia coli, Klebsiella pneumoniae, Acinetobacter baumannii, Staphylococcus aureus, Candida albicans, Pseudomonas aeruginosa, Streptococcus pneumoniae, Candida tropicalis, Candida glabrata, Chryseobacterium gleum, Enterococcus faecium, Stenotrophomonas maltophilia |
| <b>Bile</b>                    | Escherichia coli, Klebsiella pneumoniae, Acinetobacter baumannii, Staphylococcus aureus, Candida albicans, Pseudomonas aeruginosa, Streptococcus pneumoniae, Candida tropicalis, Candida glabrata, Chryseobacterium gleum, Enterococcus faecium, Stenotrophomonas maltophilia |
| <b>Urine</b>                   | Escherichia coli, Klebsiella pneumoniae, Acinetobacter baumannii, Staphylococcus aureus, Candida albicans, Pseudomonas aeruginosa, Streptococcus pneumoniae, Candida tropicalis, Candida glabrata, Chryseobacterium gleum, Enterococcus faecium, Stenotrophomonas maltophilia |

**Table S2. Blood chemistry data**

| Group  | Number | C1q   | CRP   | PCT   | SAA   | RBC  | WBC   | Hb  | PLT | AST  | ALT  | TBIL  | DBIL | Urea | Pro-BNP | CK-MB | cTnI | PT | TT   | FIB  |
|--------|--------|-------|-------|-------|-------|------|-------|-----|-----|------|------|-------|------|------|---------|-------|------|----|------|------|
| Sepsis | 1      | 161.6 | 156.9 | 1.13  | 200   | 2.66 | 16.09 | 81  | 56  | 115  | 110  | 105   | 91.7 | 12.2 | 12.38   | 0.5   | 0.1  | 14 | 16.3 | 3.67 |
|        | 2      | 69.1  | 13.6  | 68.35 | 36.3  | 3.46 | 15.04 | 112 | 94  | 742  | 117  | 6.02  | 3.3  | 17.8 | 6.78    | 64.44 | 8.4  | 14 | 23.4 | 2.54 |
|        | 3      | 182.1 | 37.7  | 7.2   | 200   | 3.71 | 14.65 | 113 | 208 | 12   | 14   | 8.23  | 4.1  | 21.1 | 1.18    | 3.07  | 0    | 15 | 18.5 | 3.39 |
|        | 4      | 176   | 200   | 12.91 | 200   | 2.59 | 26.38 | 81  | 269 | 30   | 21   | 21.8  | 14   | 15.4 | 0.17    | 0.97  | 0    | 14 | 16.7 | 2.37 |
|        | 5      | 146.8 | 162.3 | 11.9  | 11    | 2.03 | 9.94  | 64  | 59  | 8    | 3    | 9.12  | 5    | 20.3 | 14.37   | 0.18  | 0    | 13 | 19.9 | 5.54 |
|        | 6      | 134.7 | 134.7 | 17.4  | 165   | 3.54 | 12.18 | 110 | 155 | 49   | 31   | 17.99 | 11.2 | 5.83 | 0.64    | 21.74 | 0.1  | 18 | 16.8 | 4.13 |
|        | 7      | 183.2 | 169.9 | 45.91 | 56.3  | 4.23 | 12.56 | 128 | 63  | 66   | 51   | 34.1  | 15.5 | 10.1 | 0.38    | 4.21  | 0    | 11 | 15.6 | 5.48 |
|        | 8      | 146.6 | 112.6 | 7.62  | 56    | 4.7  | 5.65  | 152 | 90  | 28   | 12   | 11.73 | 5.1  | 4.47 | 1.28    | 1.17  | 0    | 11 | 15.3 | 4.96 |
|        | 9      | 170.8 | 146.2 | 83.32 | 119   | 3.61 | 34.4  | 108 | 164 | 28   | 12   | 14.42 | 7.4  | 12.5 | 2.7     | 0.35  | 0    | 14 | 14.2 | 4.7  |
|        | 10     | 158.7 | 0.5   | 175.6 | 125   | 3.83 | 3.54  | 113 | 249 | 3497 | 1069 | 24.45 | 8    | 25.7 | 0.05    | 4.23  | 1    | 11 | 15.3 | 4.96 |
|        | 11     | 143.5 | 26.56 | 90.35 | 185.9 | 4.61 | 51.8  | 138 | 16  | 142  | 46   | 9.67  | 4.9  | 21.4 | 6.46    | 1.9   | 0.5  | 15 | 17.8 | 1.91 |
|        | 12     | 137.2 | 109.3 | 733.1 | 200   | 4.42 | 24.23 | 135 | 101 | 52   | 24   | 16.9  | 6.8  | 13.6 | 43.87   | 20.43 | 3.7  | 15 | 80.2 | 0.91 |
|        | 13     | 187   | 134.6 | 90.7  | 200   | 2.59 | 5.6   | 79  | 45  | 27   | 10   | 21.9  | 11.5 | 20   | 33.5    | 7.83  | 2.3  | 14 | 14.3 | 8.73 |

|  |    |        |       |       |       |      |       |     |     |      |     |       |      |      |       |       |     |    |      |      |
|--|----|--------|-------|-------|-------|------|-------|-----|-----|------|-----|-------|------|------|-------|-------|-----|----|------|------|
|  | 14 | 179.7  | 45.26 | 7.9   | 10.6  | 6.52 | 47.32 | 218 | 16  | 825  | 312 | 19.2  | 8.9  | 5.7  | 2.19  | 5.32  | 0.4 | 19 | 66.3 | 2.34 |
|  | 15 | 144.2  | 56    | 12.6  | 74.6  | 2.44 | 24.1  | 201 | 120 | 957  | 134 | 18.2  | 11.9 | 8.32 | 5.11  | 26.7  | 0.2 | 12 | 16.2 | 4.36 |
|  | 16 | 143.7  | 184.3 | 76.6  | 39.2  | 3.85 | 16.03 | 120 | 116 | 161  | 232 | 22.2  | 12.3 | 12.3 | 6.05  | 1.95  | 0.5 | 16 | 14.9 | 4.13 |
|  | 17 | 142    | 143.3 | 13.56 | 75    | 4.66 | 7.38  | 151 | 76  | 43   | 62  | 8.6   | 4.5  | 20.6 | 0.46  | 1.23  | 0.1 | 21 | 16.3 | 5.68 |
|  | 18 | 193.5  | 200   | 147.8 | 200   | 3.15 | 10.18 | 104 | 43  | 164  | 37  | 12.01 | 7.3  | 14.3 | 3.04  | 11.85 | 0.2 | 14 | 13.1 | 5.83 |
|  | 19 | 193.9  | 195.3 | 83.29 | 162   | 4.29 | 24.42 | 116 | 224 | 38   | 17  | 18.5  | 12.8 | 11.7 | 2.32  | 0.88  | 0.4 | 15 | 15.2 | 6.37 |
|  | 20 | 135.5  | 170.6 | 66.64 | 122   | 3.53 | 9.28  | 111 | 114 | 109  | 75  | 27.15 | 20.3 | 7.39 | 0.68  | 2.18  | 0.1 | 13 | 15.2 | 3.71 |
|  | 21 | 170.9  | 207.4 | 100   | 145   | 3.74 | 11.11 | 109 | 49  | 57   | 25  | 28.7  | 21   | 9.28 | 14.38 | 7.23  | 1   | 13 | 13.6 | 6.76 |
|  | 22 | 142.6  | 154.3 | 52.19 | 132   | 3.44 | 12.97 | 99  | 264 | 54   | 20  | 9.6   | 5.5  | 3.52 | 2.43  | 1.2   | 1.1 | 13 | 15.2 | 3.71 |
|  | 23 | 112.7  | 112.2 | 54.19 | 120   | 3.72 | 12.52 | 104 | 121 | 25   | 17  | 18.4  | 9.8  | 5.31 | 6.95  | 5     | 2.5 | 16 | 14   | 7.65 |
|  | 24 | 174.8  | 183.3 | 140.2 | 200   | 3.54 | 19.75 | 117 | 120 | 28   | 13  | 12.4  | 4.7  | 10.4 | 2.28  | 1.08  | 0   | 13 | 14.6 | 5.83 |
|  | 25 | 140.9  | 52.7  | 64.38 | 131.9 | 4.52 | 8.05  | 151 | 114 | 31   | 35  | 48.9  | 16.9 | 10.3 | 3.1   | 1.49  | 0.1 | 13 | 16.6 | 5.83 |
|  | 26 | 150.4  | 224.2 | 122.3 | 200   | 3.85 | 38.22 | 106 | 86  | 86   | 49  | 16.4  | 11.8 | 14   | 18.94 | 10.83 | 0.8 | 15 | 18.1 | 4.39 |
|  | 27 | 142.3  | 200   | 100   | 200   | 4.31 | 26.9  | 136 | 69  | 94   | 125 | 83.3  | 71.6 | 22.3 | 1.07  | 5.26  | 0   | 18 | 15.5 | 7.92 |
|  | 28 | 139    | 23.1  | 39.88 | 119   | 4.06 | 5.17  | 133 | 109 | 36   | 15  | 33.6  | 13   | 12.3 | 0.6   | 7.06  | 0   | 14 | 13.6 | 9.03 |
|  | 29 | 111.1  | 25.3  | 18.3  | 64.2  | 4.18 | 10.77 | 123 | 97  | 87   | 64  | 11.11 | 7.8  | 22.9 | 1.64  | 7.42  | 0.1 | 22 | 18.1 | 2.65 |
|  | 30 | 181.2  | 22.9  | 18.9  | 69.1  | 4.04 | 14.31 | 122 | 235 | 50   | 76  | 39.1  | 21.3 | 3.81 | 1.61  | 5.01  | 0.1 | 11 | 15.9 | 4.85 |
|  | 31 | 127.2  | 199.8 | 100   | 300   | 2.14 | 12.67 | 63  | 25  | 26   | 19  | 4.45  | 2.1  | 30.9 | 18.31 | 5.65  | 0   | 13 | 15.4 | 4.13 |
|  | 32 | 201.6  | 206.6 | 3.12  | 300   | 3.53 | 18.47 | 102 | 209 | 19   | 12  | 8.88  | 3    | 3.1  | 5.86  | 1.42  | 0   | 13 | 14.2 | 6.39 |
|  | 33 | 91.1   | 152.4 | 103.6 | 151.9 | 3.27 | 10.52 | 97  | 56  | 15   | 17  | 12.8  | 5.9  | 8.1  | 2.28  | 0.86  | 0   | 18 | 16.3 | 1.92 |
|  | 34 | 135    | 229.8 | 63.4  | 300   | 3.71 | 12.22 | 112 | 15  | 17   | 29  | 14    | 6.8  | 15.5 | 16.21 | 0.37  | 0.1 | 12 | 13.4 | 7.68 |
|  | 35 | 153.3  | 333.6 | 332   | 300   | 3.3  | 33.72 | 100 | 15  | 52   | 18  | 17.11 | 12.3 | 23.9 | 17.6  | 7.38  | 0.5 | 29 | 15.2 | 6.2  |
|  | 36 | 183.87 | 51.3  | 1.35  | 135.9 | 2.7  | 4.22  | 72  | 193 | 52   | 72  | 4.6   | 1.9  | 18.5 | 0.1   | 3.15  | 0   | 14 | 17.1 | 4.82 |
|  | 37 | 151.4  | 213.6 | 100   | 300   | 3.56 | 9.89  | 108 | 38  | 60   | 38  | 10.5  | 4.5  | 9.38 | 9.01  | 13.56 | 8.6 | 15 | 15.6 | 4.83 |
|  | 38 | 135.8  | 155.9 | 100   | 5     | 4.15 | 15.42 | 130 | 16  | 647  | 125 | 119.3 | 93.6 | 15.8 | 7.833 | 15.14 | 0.2 | 21 | 23.7 | 1.03 |
|  | 39 | 98     | 234   | 10.75 | 300   | 3.91 | 6.91  | 118 | 56  | 65   | 65  | 60.45 | 45   | 3.13 | 0.46  | 0.18  | 0   | 15 | 15.6 | 3.89 |
|  | 40 | 125.2  | 29.81 | 8.82  | 300   | 4.6  | 8.68  | 128 | 206 | 35   | 29  | 6.16  | 2    | 3.16 | 0.613 | 5.2   | 0   | 11 | 15.5 | 3.08 |
|  | 41 | 120.5  | 59.63 | 15.1  | 134.2 | 3.43 | 6.8   | 101 | 159 | 31   | 13  | 9.8   | 4.7  | 9.15 | 0.65  | 4.68  | 0   | 15 | 14   | 6.57 |
|  | 42 | 191.5  | 0.5   | 0.1   | 5     | 4.3  | 7.5   | 127 | 264 | 18   | 20  | 6.8   | 2.3  | 4.86 | 0.04  | 1.7   | 0   | 12 | 16.7 | 3.95 |
|  | 43 | 151.6  | 335.9 | 4.59  | 300   | 4.11 | 11.2  | 30  | 257 | 31   | 16  | 111.4 | 4.8  | 11.7 | 0.48  | 1.17  | 0   | 12 | 14.7 | 8.42 |
|  | 44 | 125.2  | 156.6 | 16.7  | 300   | 3.64 | 12.76 | 117 | 141 | 37   | 32  | 22.4  | 10   | 4.4  | 2.05  | 3.91  | 0.1 | 12 | 13.4 | 4.35 |
|  | 45 | 157.1  | 132   | 99.6  | 300   | 3.1  | 33.99 | 76  | 54  | 2116 | 503 | 12.64 | 9.6  | 31.1 | 66.55 | 1.65  | 1   | 21 | 16.8 | 6.57 |
|  | 46 | 175.7  | 110   | 0.31  | 300   | 9.72 | 10.52 | 171 | 130 | 22   | 22  | 24.6  | 12.4 | 6.49 | 2.73  | 0.87  | 0   | 15 | 14.8 | 4.3  |
|  | 47 | 179.9  | 0.5   | 0.03  | 5     | 4.51 | 5.46  | 152 | 198 | 19   | 18  | 16.1  | 6.9  | 4.42 | 0.064 | 0.36  | 0   | 11 | 16.1 | 2.76 |
|  | 48 | 94.8   | 12.5  | 38.9  | 124.6 | 3.46 | 11.7  | 109 | 71  | 45   | 13  | 59.4  | 6.7  | 1.25 | 0.07  | 0.91  | 0.1 | 14 | 13.3 | 6.2  |
|  | 49 | 126    | 163.2 | 100   | 200   | 2.8  | 12.76 | 97  | 22  | 514  | 358 | 82.5  | 31.3 | 33.7 | 9.01  | 9.27  | 0.9 | 12 | 18.4 | 3.46 |
|  | 50 | 134.9  | 249.7 | 85.9  | 300   | 4.29 | 11.85 | 126 | 126 | 42   | 46  | 20    | 8.9  | 13.1 | 0.76  | 3.87  | 0   | 12 | 13.9 | 9.06 |
|  | 51 | 190.1  | 94    | 100   | 300   | 3.33 | 8.36  | 96  | 128 | 22   | 17  | 1.87  | 0.9  | 25.4 | 6.68  | 2.25  | 0.7 | 12 | 15.3 | 3.25 |

|  |    |       |       |       |       |      |       |     |     |      |      |       |      |      |       |       |     |     |      |      |
|--|----|-------|-------|-------|-------|------|-------|-----|-----|------|------|-------|------|------|-------|-------|-----|-----|------|------|
|  | 52 | 218   | 5.15  | 0.66  | 5     | 3.13 | 3.84  | 82  | 320 | 18   | 8    | 6.22  | 2.6  | 3.73 | 0.07  | 0.18  | 0   | 11  | 16.1 | 4.09 |
|  | 53 | 163.1 | 167.1 | 62.1  | 300   | 3.71 | 12.61 | 114 | 108 | 26   | 9    | 36.26 | 13.7 | 7    | 1.3   | 6.13  | 0.2 | 12  | 13.7 | 7.41 |
|  | 54 | 201   | 350   | 60.4  | 300   | 3.21 | 24.6  | 91  | 130 | 26   | 33   | 11.3  | 5    | 7.29 | 12.62 | 1.15  | 0.4 | 15  | 16.3 | 4.54 |
|  | 55 | 142.2 | 110   | 100   | 200   | 3.01 | 45.95 | 90  | 157 | 82   | 92   | 5.63  | 2.3  | 13.7 | 3.59  | 10.57 | 0.4 | 19  | 116  | 2.1  |
|  | 56 | 150   | 36.71 | 100   | 195.6 | 3.33 | 22.61 | 110 | 230 | 18   | 18   | 5.85  | 2.2  | 19   | 2.14  | 4.71  | 0.3 | 13  | 16.3 | 2.55 |
|  | 57 | 89.1  | 26.09 | 60.83 | 31.92 | 2.15 | 7.61  | 91  | 77  | 542  | 411  | 42.2  | 19.5 | 16.6 | 17.79 | 27.13 | 1.3 | 18  | 15.8 | 1.52 |
|  | 58 | 99.9  | 45.62 | 100   | 300   | 2.78 | 20.66 | 91  | 86  | 31   | 9    | 12.5  | 8.2  | 21.1 | 38.14 | 2.755 | 0.6 | 14  | 14.5 | 3.62 |
|  | 59 | 180.5 | 88.35 | 50.5  | 300   | 4.52 | 7.86  | 138 | 174 | 21   | 24   | 14.6  | 6.3  | 8.92 | 0.14  | 2.29  | 0   | 13  | 14.8 | 6.57 |
|  | 60 | 171.6 | 48.99 | 2.68  | 165   | 1.86 | 5.77  | 55  | 149 | 19   | 14   | 4.82  | 2.7  | 8.84 | 9.08  | 0.35  | 0   | 13  | 15.3 | 3.13 |
|  | 61 | 177.9 | 47.47 | 1.12  | 300   | 3.94 | 1.48  | 115 | 593 | 27   | 32   | 8.9   | 2.8  | 3.41 | 0.24  | 0.18  | 0   | 11  | 12.9 | 6.57 |
|  | 62 | 58    | 108   | 47.5  | 161   | 3.74 | 3.31  | 116 | 35  | 914  | 527  | 58.3  | 44.9 | 8.09 | 22.09 | 12.11 | 0.2 | 33  | 27.5 | 1.87 |
|  | 63 | 136.8 | 12.6  | 60.2  | 200   | 3.17 | 29.38 | 101 | 121 | 32   | 20   | 13.35 | 7    | 6.1  | 4.87  | 3.58  | 0   | 14  | 14.5 | 3.12 |
|  | 64 | 188   | 45.2  | 13.8  | 195.6 | 4.47 | 8.91  | 142 | 244 | 45   | 23   | 24.3  | 10.6 | 15   | 2.74  | 15.03 | 0.4 | 13  | 15.8 | 5.26 |
|  | 65 | 153.1 | 23.9  | 4.8   | 156.4 | 3.66 | 31.52 | 122 | 26  | 744  | 221  | 111.9 | 92   | 15.1 | 43.76 | 5.51  | 3.9 | 16  | 15.4 | 4.42 |
|  | 66 | 137   | 241.8 | 11.5  | 300   | 2.84 | 15.74 | 90  | 92  | 23   | 14   | 12.42 | 5.2  | 18.4 | 3.59  | 1.13  | 0   | 15  | 13.9 | 4.14 |
|  | 67 | 181.7 | 76.14 | 0.5   | 179   | 3.42 | 1.7   | 82  | 63  | 261  | 202  | 22.8  | 12   | 5.6  | 3.06  | 1.3   | 0   | 13  | 20.9 | 1.07 |
|  | 68 | 167.9 | 68.84 | 0.5   | 206   | 2.47 | 1.86  | 72  | 54  | 14   | 9    | 10.2  | 5.7  | 8.52 | 0.36  | 1.71  | 0   | 13  | 16.8 | 2.94 |
|  | 69 | 156   | 293.7 | 100   | 300   | 2.28 | 15.34 | 70  | 98  | 24   | 8    | 18.7  | 10.4 | 49   | 18.95 | 0.99  | 1.3 | 12  | 15.6 | 5.26 |
|  | 70 | 106   | 227.9 | 12    | 300   | 3.96 | 13.17 | 127 | 40  | 51   | 11   | 35.4  | 30.6 | 30.3 | 4.68  | 5     | 0.1 | 38  | 14.7 | 0.57 |
|  | 71 | 145.8 | 110.5 | 0.41  | 12.53 | 2.47 | 8.59  | 75  | 344 | 17   | 18   | 8.97  | 4.5  | 6.98 | 0.27  | 5.41  | 0   | 17  | 16.5 | 4.46 |
|  | 72 | 159.2 | 121.5 | 0.2   | 298   | 2.95 | 6.32  | 90  | 292 | 11   | 8    | 8.6   | 3.9  | 3.9  | 0.83  | 0.42  | 0   | 13  | 14.8 | 2.88 |
|  | 73 | 16.9  | 130   | 28.3  | 300   | 3.29 | 7.05  | 89  | 389 | 10   | 11   | 16.1  | 11   | 11.2 | 0.68  | 0.82  | 0   | 12  | 15   | 4.67 |
|  | 74 | 105.7 | 220   | 25.3  | 300   | 4.28 | 12.22 | 130 | 149 | 23   | 19   | 45.49 | 27   | 22   | 14.04 | 22    | 0.3 | 35  | 15.2 | 5.55 |
|  | 75 | 114.2 | 204   | 22.5  | 280   | 1.5  | 8.59  | 53  | 33  | 29   | 15   | 19.75 | 16.5 | 12.4 | 33.58 | 3.9   | 0.1 | 21  | 15.4 | 2.51 |
|  | 76 | 129.9 | 350   | 0.61  | 300   | 3.6  | 11.73 | 111 | 186 | 27   | 16   | 8.1   | 3.3  | 5.98 | 2.93  | 6.04  | 0.1 | 12  | 17.1 | 6.03 |
|  | 77 | 140.4 | 44.1  | 1.86  | 87.7  | 2.01 | 5.97  | 64  | 107 | 18   | 13   | 25.2  | 12.5 | 6.03 | 5.53  | 0.733 | 0.7 | 11  | 15.4 | 2.41 |
|  | 78 | 99.7  | 158.7 | 5.73  | 300   | 5.13 | 40.4  | 168 | 281 | 20   | 646  | 7.3   | 4.7  | 22.8 | 1.41  | 0.96  | 0   | 13  | 6.8  | 5.11 |
|  | 79 | 126.9 | 193.9 | 11.3  | 300   | 3.9  | 14.2  | 120 | 109 | 335  | 646  | 68.8  | 52.6 | 16   | 2.2   | 1.14  | 0   | 17  | 16.3 | 5.55 |
|  | 80 | 184.2 | 0.5   | 12.9  | 29.27 | 4.09 | 4.24  | 128 | 23  | 643  | 239  | 6.7   | 2.9  | 6.2  | 9.14  | 21.3  | 1.9 | 12  | 20   | 1.59 |
|  | 81 | 184.1 | 112.6 | 65.4  | 300   | 3.38 | 10.58 | 111 | 38  | 82   | 148  | 13.8  | 9.6  | 17.3 | 18.3  | 7.34  | 2.2 | 2.6 | 17.8 | 3.95 |
|  | 82 | 90.5  | 85.85 | 109   | 6.02  | 2.51 | 11.6  | 73  | 41  | 1950 | 1675 | 78    | 59   | 28.5 | 0.66  | 17.8  | 2.1 | 59  | 67.6 | 0.68 |
|  | 83 | 161.4 | 153   | 78.5  | 291.4 | 3.73 | 14.73 | 115 | 127 | 229  | 361  | 73.2  | 51.7 | 11.4 | 1.09  | 0.61  | 0   | 16  | 16   | 5.26 |
|  | 84 | 164.9 | 184   | 24.6  | 300   | 4.15 | 24.83 | 131 | 89  | 63   | 49   | 66.7  | 56.8 | 21   | 1.79  | 1.59  | 0.1 | 12  | 14.7 | 7.89 |
|  | 85 | 124.6 | 142   | 99.5  | 300   | 0.58 | 19.98 | 110 | 113 | 18   | 17   | 8.31  | 2.6  | 15.6 | 12.16 | 4.74  | 0.4 | 13  | 13.7 | 6.2  |
|  | 86 | 133.2 | 177.5 | 100   | 300   | 3.49 | 28.4  | 106 | 49  | 23   | 21   | 11    | 4.1  | 12.1 | 6.28  | 1.01  | 0.2 | 13  | 14.9 | 4.35 |
|  | 87 | 156.1 | 17.43 | 80.58 | 16.48 | 3.32 | 14.31 | 98  | 200 | 18   | 15   | 4.9   | 1.4  | 16.7 | 81.3  | 6.62  | 0.8 | 12  | 16.1 | 4.24 |
|  | 88 | 152.5 | 140.6 | 1.03  | 300   | 4.04 | 19.56 | 119 | 110 | 93   | 67   | 17.7  | 7.7  | 11.7 | 5.3   | 3.49  | 0.2 | 13  | 15.7 | 3.62 |
|  | 89 | 89.4  | 25.9  | 20.5  | 25.63 | 3.55 | 14.79 | 101 | 292 | 12   | 15   | 5.5   | 2.5  | 34.2 | 15.6  | 15.9  | 3.1 | 15  | 19.1 | 3.61 |

|  |     |       |       |       |       |      |       |     |     |     |      |      |      |      |       |       |     |    |      |      |
|--|-----|-------|-------|-------|-------|------|-------|-----|-----|-----|------|------|------|------|-------|-------|-----|----|------|------|
|  | 90  | 132   | 240.9 | 69.7  | 300   | 3.38 | 31.93 | 101 | 43  | 33  | 25   | 21.8 | 9    | 16.1 | 21.2  | 3.4   | 1.1 | 12 | 14.9 | 5.1  |
|  | 91  | 182.2 | 269.3 | 8.43  | 300   | 3.4  | 12.93 | 113 | 236 | 36  | 20   | 5.8  | 3.1  | 9.9  | 0.25  | 0.71  | 0   | 14 | 14.2 | 7.89 |
|  | 92  | 197   | 11.5  | 0.42  | 13.26 | 3.61 | 7.84  | 107 | 83  | 109 | 100  | 7.06 | 2.7  | 7.5  | 0.65  | 0.72  | 0   | 10 | 19.6 | 2.16 |
|  | 93  | 176   | 23.1  | 13.1  | 24.63 | 3.74 | 14.99 | 124 | 103 | 20  | 24   | 11.4 | 5.7  | 5.5  | 1.08  | 0.6   | 0   | 12 | 13.4 | 6.97 |
|  | 94  | 123.4 | 148.1 | 0.6   | 107.2 | 2.56 | 2.54  | 81  | 82  | 60  | 63   | 22.8 | 12.8 | 4.5  | 1.2   | 0.99  | 0   | 15 | 18.5 | 2.32 |
|  | 95  | 180.4 | 12.84 | 1.37  | 55.32 | 4.2  | 17.24 | 126 | 78  | 66  | 28   | 21.3 | 6.1  | 40.8 | 0.62  | 4.82  | 0   | 13 | 17   | 3.46 |
|  | 96  | 183.8 | 99.79 | 1.16  | 300   | 3.49 | 9.32  | 102 | 475 | 21  | 28   | 4.66 | 1.4  | 4.26 | 0.16  | 0.18  | 0   | 12 | 19   | 6.77 |
|  | 97  | 69.8  | 56.2  | 3.43  | 200   | 3.54 | 6.74  | 124 | 177 | 23  | 21   | 18.2 | 6.9  | 4.5  | 5.36  | 1.68  | 2.3 | 14 | 14.8 | 4.87 |
|  | 98  | 191.1 | 86.72 | 0.21  | 95.81 | 4.44 | 17.8  | 140 | 546 | 20  | 18   | 53   | 44.3 | 4.6  | 1.4   | 1.11  | 0   | 16 | 16.9 | 4.82 |
|  | 99  | 125.1 | 348.6 | 68.5  | 300   | 2.38 | 15.06 | 70  | 169 | 24  | 13   | 6.5  | 3.3  | 25.2 | 38    | 5.03  | 0.3 | 13 | 14.3 | 5.76 |
|  | 100 | 174.3 | 120.6 | 6.24  | 113.5 | 3.54 | 13.99 | 109 | 199 | 16  | 19   | 11.2 | 4.8  | 10.2 | 2.26  | 0.18  | 0   | 11 | 14   | 8.33 |
|  | 101 | 155.3 | 247.5 | 13.3  | 300   | 3.43 | 25.17 | 109 | 28  | 16  | 10   | 15.2 | 5.1  | 13.6 | 18.54 | 0.18  | 0.7 | 12 | 14.6 | 5.43 |
|  | 102 | 72.6  | 85.02 | 3.96  | 222.5 | 3.62 | 8.77  | 110 | 102 | 138 | 79   | 19.8 | 8.4  | 7.2  | 0.2   | 60.02 | 4.9 | 15 | 15.1 | 2.02 |
|  | 103 | 99.6  | 30.3  | 110.8 | 5     | 3.47 | 18.08 | 106 | 290 | 129 | 28   | 8.2  | 3.5  | 13.6 | 5.76  | 18.5  | 1.1 | 13 | 14.4 | 2.77 |
|  | 104 | 152.6 | 185.5 | 1.63  | 300   | 3.98 | 20.3  | 116 | 368 | 85  | 52   | 7.9  | 4.4  | 7.5  | 12.25 | 2.45  | 0.7 | 18 | 14.7 | 7.5  |
|  | 105 | 154.6 | 117.5 | 1.31  | 25.6  | 2.01 | 6.75  | 62  | 196 | 14  | 17   | 0.5  | 3.6  | 5.7  | 0.8   | 1.31  | 0.1 | 13 | 14.9 | 2.31 |
|  | 106 | 78.7  | 0.5   | 0.1   |       | 2.2  | 9.43  | 54  | 93  | 28  | 15   | 56.7 | 20.2 | 5.64 | 6.6   | 0.86  | 0.2 | 13 | 17   | 1.74 |
|  | 107 | 190.6 | 160.8 | 19.4  | 300   | 4.19 | 6.23  | 129 | 126 | 14  | 11   | 12   | 4.3  | 18.7 | 0.1   | 1.01  | 0.2 | 12 | 16.4 | 3.75 |
|  | 108 | 142.1 | 174   | 95.1  | 300   | 3.28 | 29.4  | 104 | 163 | 40  | 11   | 9.6  | 3.5  | 9.6  | 5.42  | 13.79 | 0.8 | 15 | 14.5 | 5.24 |
|  | 109 | 130.8 | 297.3 | 35.7  | 300   | 3.6  | 23.6  | 114 | 139 | 530 | 3261 | 69.5 | 38.8 | 15.8 | 17.71 | 16.5  | 1.2 | 34 | 14.9 | 8.43 |
|  | 110 | 116.8 | 9.33  | 2.51  | 8.42  | 2.07 | 3.56  | 69  | 74  | 28  | 14   | 3.8  | 1.7  | 13.2 | 10.45 | 6.67  | 0.1 | 13 | 15.5 | 1.59 |
|  | 111 | 112.8 | 228   | 100   | 300   | 3.69 | 6.03  | 119 | 169 | 72  | 34   | 24   | 11.7 | 28.4 | 2.5   | 2.83  | 1   | 15 | 16.4 | 4.42 |
|  | 112 | 126.4 | 222   | 63.3  | 82.5  | 5.39 | 20.3  | 159 | 80  | 294 | 100  | 14.5 | 5.2  | 22.7 | 0.19  | 19.5  | 0.9 | 14 | 18.2 | 3.51 |
|  | 113 | 183.9 | 120.5 | 27.2  | 42.9  | 3.18 | 14.12 | 99  | 268 | 33  | 30   | 7.4  | 4.1  | 9.43 | 0.39  | 1.69  | 0   | 12 | 14.6 | 7.94 |
|  | 114 | 104.9 | 173.4 | 14.2  | 300   | 3.62 | 7.43  | 111 | 49  | 111 | 44   | 46   | 36.4 | 6.43 | 3.95  | 0.4   | 0.1 | 13 | 13.2 | 6.72 |
|  | 115 | 145   | 299.6 | 7.44  | 300   | 3.88 | 22.33 | 118 | 252 | 36  | 20   | 41   | 33   | 8.1  | 0.13  | 2.49  | 0   | 14 | 14.3 | 9.31 |
|  | 116 | 132.7 | 116   | 3.51  | 22.1  | 3.14 | 7.27  | 100 | 98  | 123 | 144  | 39.4 | 33.5 | 14.8 | 0.88  | 3.58  | 0   | 12 | 17.4 | 4.18 |
|  | 117 | 142.7 | 332   | 100   | 300   | 3.79 | 36.27 | 111 | 120 | 40  | 17   | 9.6  | 5.5  | 15.2 | 0.44  | 4.47  | 0.1 | 13 | 14   | 7.9  |
|  | 118 | 105.5 | 115.6 | 10.4  | 200   | 3.23 | 9.7   | 79  | 220 | 24  | 6    | 7.8  | 4.5  | 18.3 | 0.77  | 8.85  | 0.5 | 10 | 14.7 | 5    |
|  | 119 | 133.7 | 142.4 | 15.3  | 300   | 4.04 | 18.93 | 107 | 136 | 18  | 17   | 10   | 4    | 10.7 | 0.38  | 2.46  | 0.1 | 14 | 15.5 | 4.42 |
|  | 120 | 180.7 | 77.59 | 20    | 300   | 2.85 | 17.78 | 74  | 222 | 601 | 245  | 5.1  | 2.1  | 17.5 | 7.11  | 141.5 | 37  | 13 | 14.9 | 1.66 |
|  | 121 | 150.8 | 22.13 | 0.1   | 98.98 | 3.97 | 9.39  | 113 | 218 | 17  | 9    | 8.41 | 2.4  | 7.3  | 0.07  | 3.5   | 0   | 12 | 15.8 | 3.58 |
|  | 122 | 84.7  | 168.8 | 25.7  | 189   | 3.24 | 4.78  | 94  | 51  | 226 | 75   | 53   | 35   | 11.4 | 0.98  | 2.82  | 0.9 | 14 | 13.2 | 2.03 |
|  | 123 | 200.8 | 136.1 | 50    | 300   | 3.8  | 15.59 | 109 | 192 | 26  | 22   | 11.2 | 3.8  | 3.97 | 0.84  | 1.04  | 0.3 | 12 | 15.3 | 4.87 |
|  | 124 | 103.2 | 99.36 | 1.44  | 159.4 | 5.22 | 9.3   | 141 | 247 | 58  | 13   | 35   | 15   | 0.15 | 0.34  | 41.4  | 12  | 12 | 15.7 | 4.87 |
|  | 125 | 148.9 | 198.6 | 14.3  | 249   | 3.85 | 18.56 | 109 | 162 | 25  | 20   | 4.5  | 1.9  | 22.7 | 7.24  | 14.52 | 1.5 | 15 | 16.6 | 3.44 |
|  | 126 | 146.1 | 201.3 | 17.9  | 300   | 4.02 | 19.8  | 115 | 210 | 8   | 12   | 8.54 | 3.5  | 17.2 | 2.35  | 1.85  | 0.1 | 13 | 15.2 | 6.8  |
|  | 127 | 153.9 | 12.69 | 78.9  | 128.3 | 4.09 | 11.42 | 123 | 115 | 164 | 359  | 61.4 | 41.4 | 7.1  | 0.42  | 0.6   | 0   | 13 | 15.4 | 5.21 |













|  |    |       |     |   |      |      |      |     |     |   |   |   |   |   |   |   |   |   |   |
|--|----|-------|-----|---|------|------|------|-----|-----|---|---|---|---|---|---|---|---|---|---|
|  | 93 | 188.4 | 4   | 5 | 3.74 | 5.43 | 0.04 | 130 | 212 | - | - | - | - | - | - | - | - | - | - |
|  | 94 | 186.1 | 0.5 | 5 | 4.49 | 8.35 | 0.06 | 118 | 263 | - | - | - | - | - | - | - | - | - | - |
|  | 95 | 196.4 | 0.5 | 5 | 4.25 | 7.12 | 0.01 | 120 | 196 | - | - | - | - | - | - | - | - | - | - |

### Research Object Information Confidentiality Statement

This study is a retrospective study, which was approved by the ethics committee of the Renmin Hospital of Wuhan University (No. WDRY2020-K223) and also approved to exempt patients from informed consent.

Here, we declare that we will keep strictly confidential the clinical information of all research objects in this study (Serum C1q levels have prognostic value for sepsis and are related to the severity of sepsis and organ damage), and we will delete all identifiable information that can identify the research objects to ensure that the privacy of the research objects is protected! And we declare that our study is compliance with the Declaration of Helsinki.

Declarant: Li Huan, Chen Juanjuan, Hu Yuanhui, Cai Xin, Tang Dongling, Zhang Pingan

Address: Renmin Hospital of Wuhan University, No. 99, ZhangZhidong Road, Wuchang District, Wuhan City, Hubei Province, China

Date: 2021.09.02
